# Supplementary material for: Pentafecta for Radical Nephroureterectomy in Patients with High-Risk Upper Tract Urothelial Carcinoma: A Proposal for Standardization of Quality Care Metrics
Source: MDPI journal article supplement (doi:10.3390/cancers14071781), 2022-03-31
Supplement: s1 [file s1]

**A**

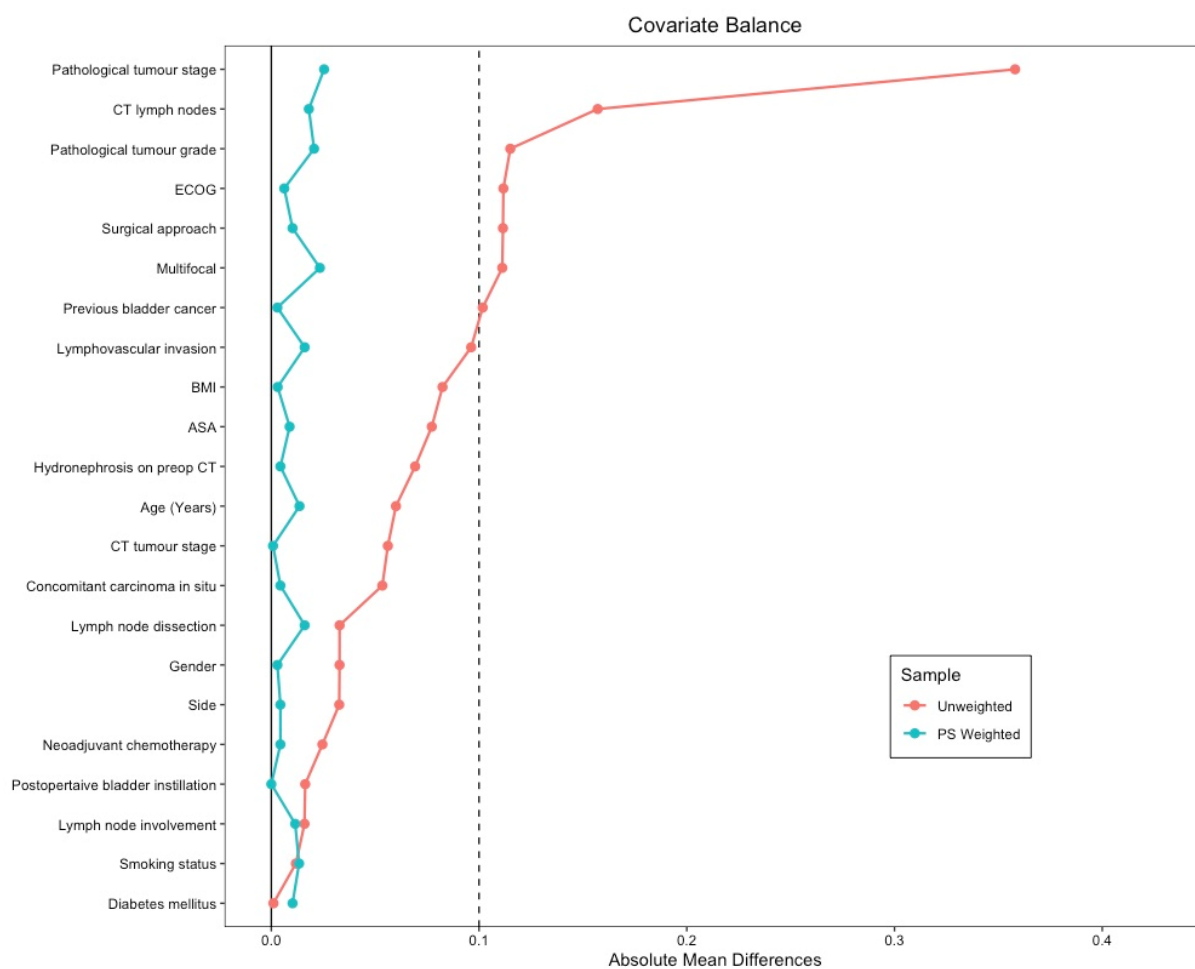

**B**

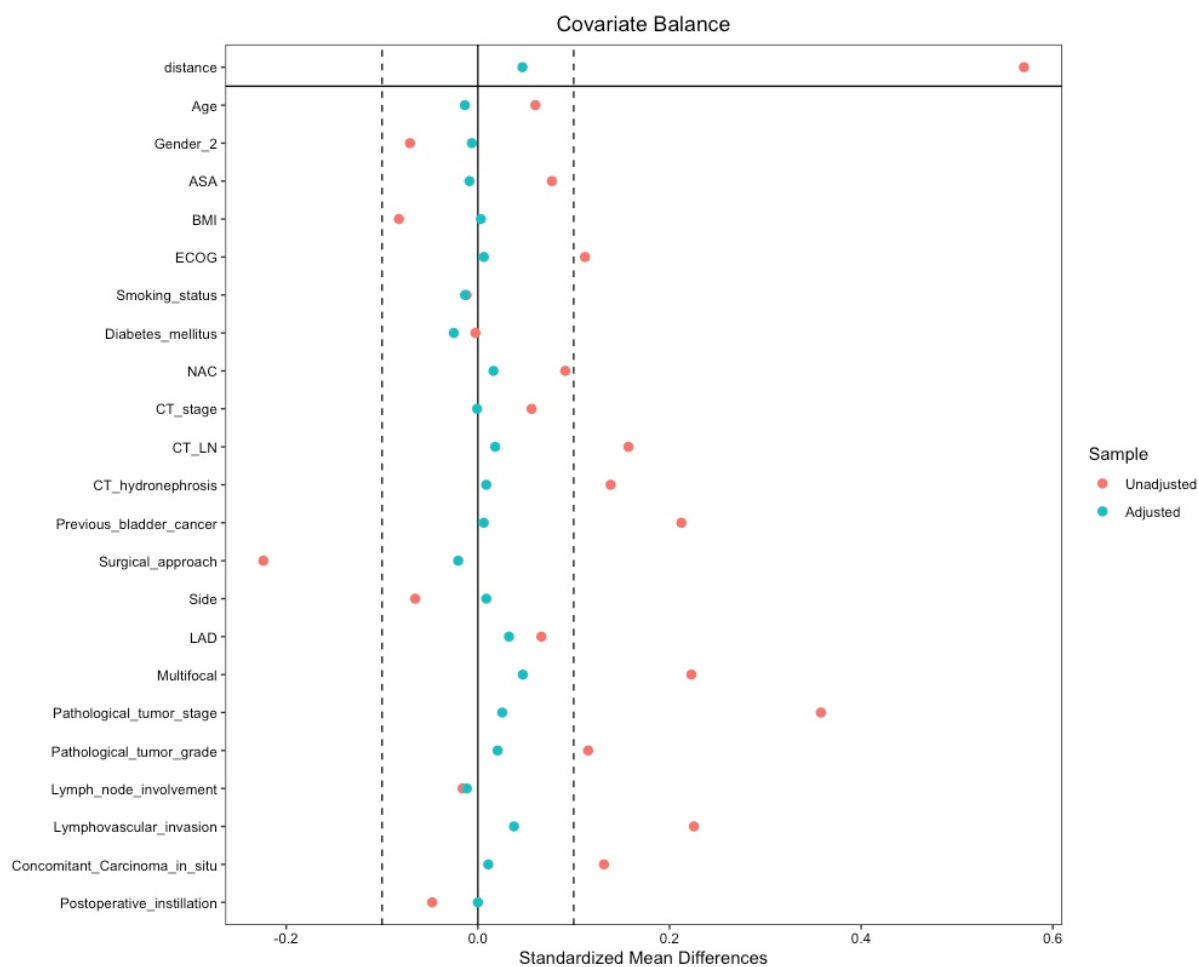

C

| Variable                   | Observations per m |             |         | Total |
|----------------------------|--------------------|-------------|---------|-------|
|                            | Complete           | Incomplete  | Imputed |       |
| ASA                        | 1481 (86.2%)       | 237 (13.8%) | 237     | 1718  |
| BMI                        | 1451 (84.5%)       | 267 (15.5%) | 267     | 1718  |
| ECOG                       | 1367 (79.6%)       | 351 (20.4%) | 351     | 1718  |
| Preoperative creatinine    | 1548 (90.1%)       | 170 (9.9%)  | 170     | 1718  |
| CT lymph nodes             | 1480 (86.1%)       | 238 (13.9%) | 238     | 1718  |
| CT hydronephrosis          | 1538 (89.5%)       | 180 (10.5%) | 180     | 1718  |
| Previous bladder cancer    | 1661 (96.7%)       | 57 (3.3%)   | 57      | 1718  |
| Multifocality              | 1709 (99.5%)       | 9 (0.5%)    | 9       | 1718  |
| Postoperative instillation | 1360 (79.2%)       | 358 (20.8%) | 358     | 1718  |

D

| Variable                          | Observations per m |             |         | Total |
|-----------------------------------|--------------------|-------------|---------|-------|
|                                   | Complete           | Incomplete  | Imputed |       |
| <b>ASA</b>                        | 1481 (86.2%)       | 237 (13.8%) | 237     | 1718  |
| <b>BMI</b>                        | 1451 (84.5%)       | 267 (15.5%) | 267     | 1718  |
| <b>ECOG</b>                       | 1367 (79.6%)       | 351 (20.4%) | 351     | 1718  |
| <b>Smoking status</b>             | 1579 (91.9%)       | 139 (8.1%)  | 139     | 1718  |
| <b>Diabetes mellitus</b>          | 1340 (78.0%)       | 378 (22.0%) | 378     | 1718  |
| <b>Preoperative creatinine</b>    | 1548 (90.1%)       | 170 (9.9%)  | 170     | 1718  |
| <b>CT lymph nodes</b>             | 1480 (86.1%)       | 238 (13.9%) | 238     | 1718  |
| <b>CT hydronephrosis</b>          | 1538 (89.5%)       | 180 (10.5%) | 180     | 1718  |
| <b>Previous bladder cancer</b>    | 1661 (96.7%)       | 57 (3.3%)   | 57      | 1718  |
| <b>Tumour side</b>                | 1678 (97.7%)       | 40 (2.3%)   | 40      | 1718  |
| <b>Multifocality</b>              | 1709 (99.5%)       | 9 (0.5%)    | 9       | 1718  |
| <b>Postoperative instillation</b> | 1360 (79.2%)       | 358 (20.8%) | 358     | 1718  |
| <b>Transfusion</b>                | 1572 (91.5%)       | 146 (8.5%)  | 146     | 1718  |
|                                   |                    |             |         |       |

**Figure S1. (A):** Absolute mean differences of covariates before (red line) and after (green line) propensity score weighting. Threshold set at 0.1. **(B):** Standardized mean differences of covariates before (red dots) and after (green dots) propensity score weighting. Threshold set at 0.1. **(C):** Imputed variables for Cox proportional hazard regression analyses. **(D):** Imputed variables for logistic regression analyses.

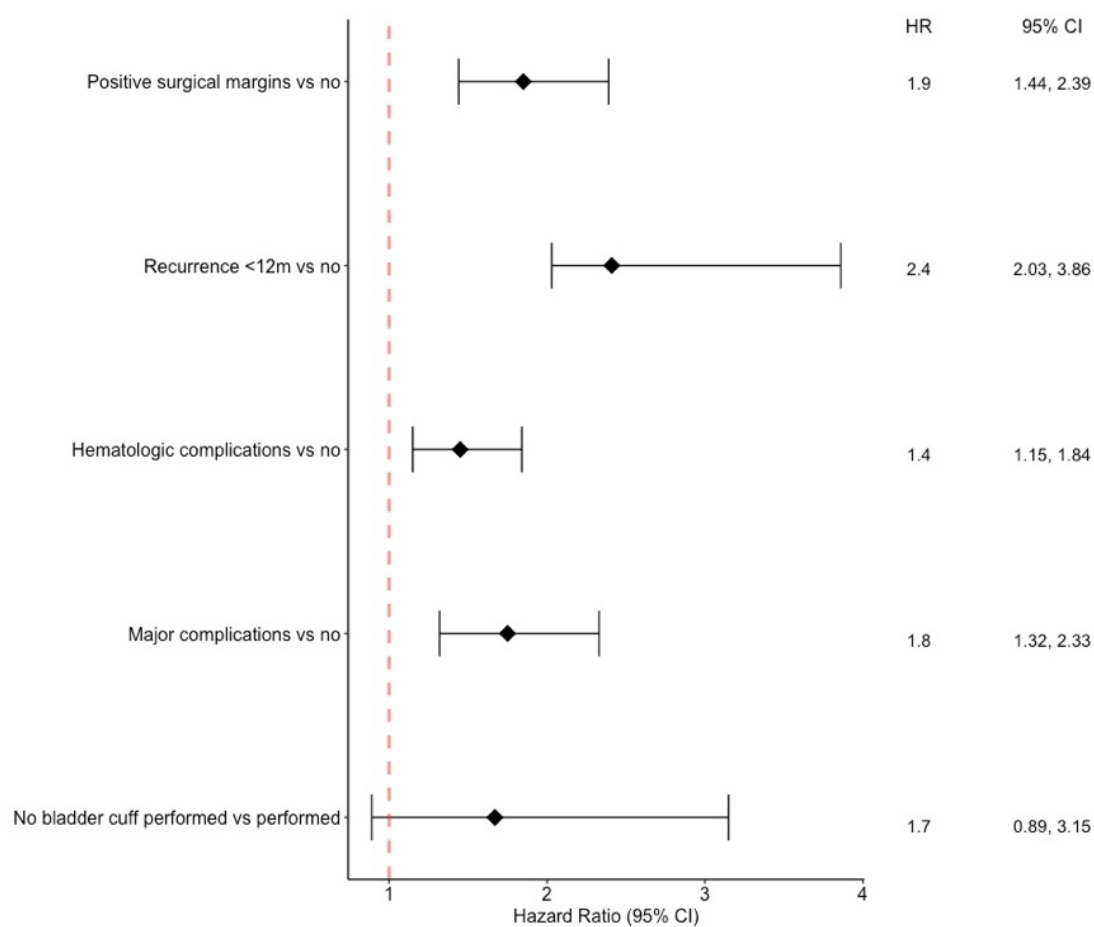

**Figure S2.** Weight of the particular pentafecta criteria on the overall survival of 1,016 propensity-score matched patients treated with RNU for high-risk UTUC. (HR=Hazard ratio; CI= confidence interval).

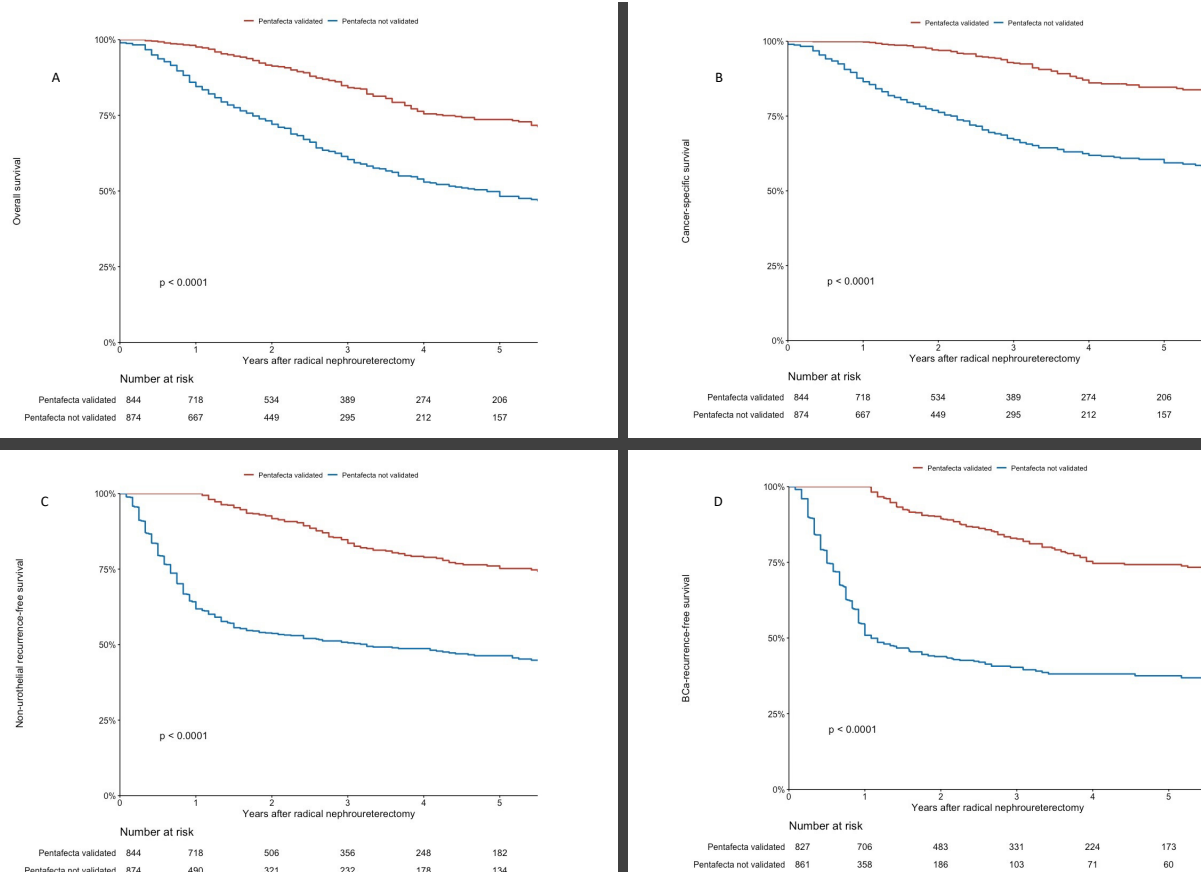

**Figure S3.** Oncologic outcomes of 1,718 patients treated with RNU for high-risk UTUC. Kaplan-Meier curves visualizing overall (A), cancer-specific (B), non-urothelial recurrence-free (C) and bladder-cancer recurrence-free survival (D).
